# Supplementary material for: β-Ketoacyl-acyl Carrier Protein Synthase I (KASI) Plays Crucial Roles in the Plant Growth and Fatty Acids Synthesis in Tobacco
Source: Int J Mol Sci. 2016 Aug 8;17(8):1287. doi: 10.3390/ijms17081287 (PMC5000684; doi:10.3390/ijms17081287)
Supplement: Supplementary file 1 [file ijms-17-01287-s001.docx]

**Supplementary Materials: MicroRNA-155 Mediates Augmented CD40 Expression in Bone Marrow Derived Plasmacytoid Dendritic Cells in Symptomatic Lupus-Prone NZB/W F1 Mice**

Sheng Yan, Lok Yan Yim, Rachel Chun Yee Tam, Albert Chan, Liwei Lu, Chak Sing Lau
and Vera Sau-Fong Chan


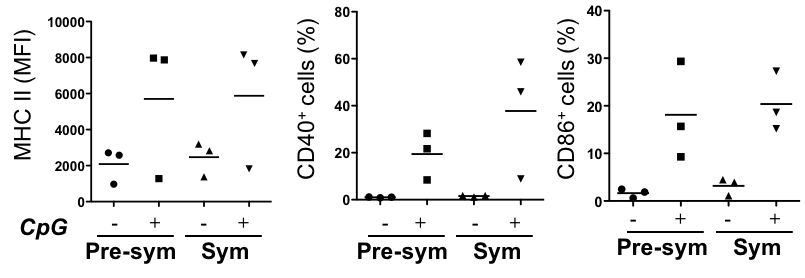


**Figure S1.** pDCs response to TLR-9 stimulation is not affected in SLE. Purified BM-derived pDCs from pre-symptomatic (Pre-sym) or symptomatic (Sym) NZB/W F1 mice were treated with (+) or without (-) 1 µM of CpG for 48 h and examined for expression of MHC class II, CD40 and CD86. Collective data illustrating changes in the mean fluorescence intensity (MFI) of MHC class II or percentages (%) of CD40 and CD86 are shown. Each symbol represents one experimental mouse
(*n* = 3). *Bar:* mean value. No statistical significances can be found (two-tailed Student’s *t*-test, unpaired).


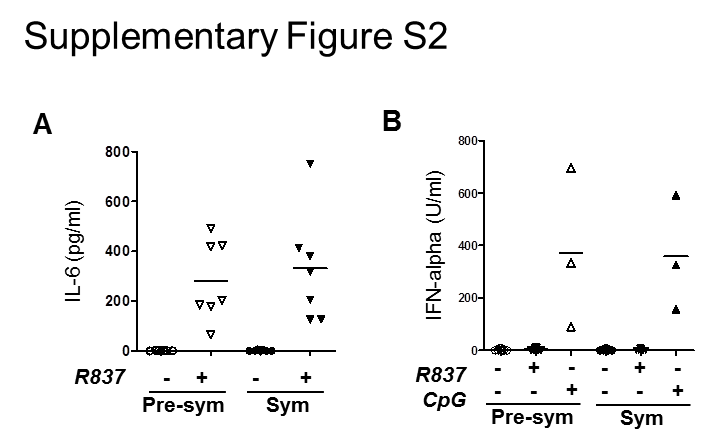


**Figure S2.** Production of IFN-α or IL-6 by activated pDCs is not affected by lupus.Secretion of(**A**) IL-6 and (**B**) IFN-α by BM-derived pDCs from pre-symptomatic (Pre-sym) and symptomatic (Sym) NZB/W F1 mice was analyzed following incubation with (+) or without (-) R837 (5 µg/mL) or CpG (1 μM) for 48 h by ELISA. Each symbol represents one experimental mouse. For IL-6, *n* = 7; for IFN-α with R837 stimulation, *n* = 9; for IFN-α with CpG stimulation, *n* = 3. *Bar:* mean value. No statistical significances can be found (two-tailed Student’s *t*-test, unpaired).


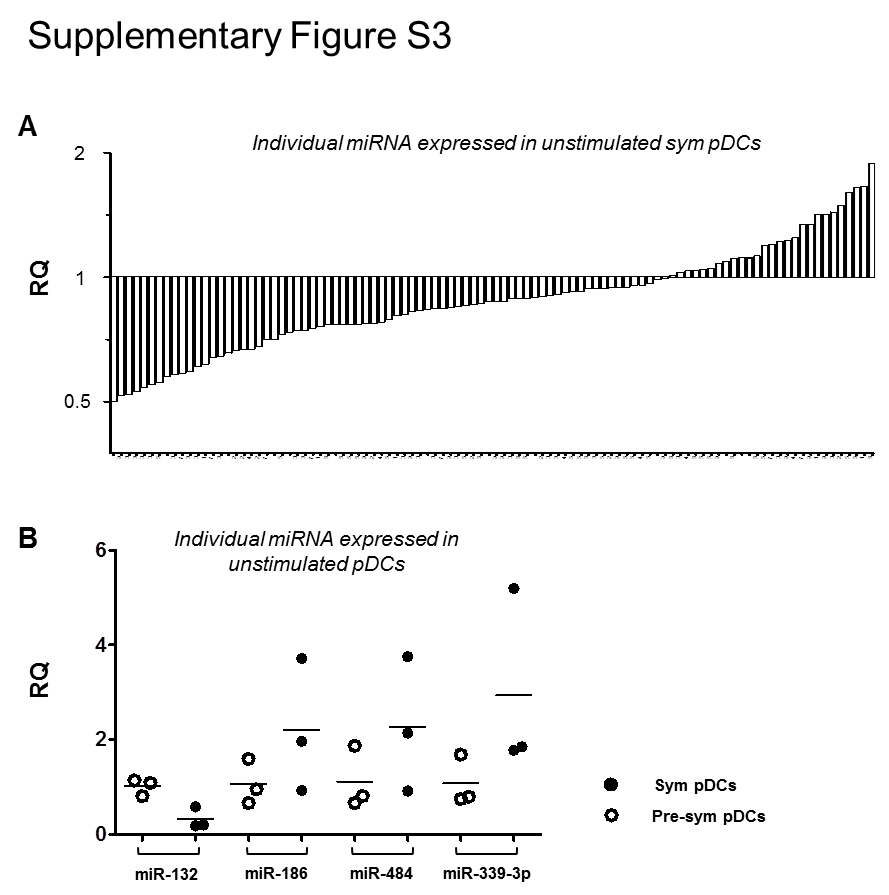


**Figure S3**. miRNA expression profile in unstimulated BM-derived-pDCs is comparable between pre-symptomatic and symptomatic mice. (**A**) The miRNA expression profiles in unstimulated pDCs from symptomatic (Sym) NZB/W F1 mice were compared with pre-symptomatic (Pre-sym) pDCs and presented as relative quantities (RQ). Each column represents the average expression of an individual miRNA target from three independent experiments. Majority of the miRNAs had a RQ within the two-fold cut off except 4 miRNAs that were further analyzed individually and results were illustrated in (**B**). The miRNAs with lowest (miR-132) and top three highest expressions (miR-186, miR-484 and miR339-3p) in unstimulated sym pDCs were compared with pre-sym pDCs. Each symbol represents one experimental mouse. *Bar:* mean values. No statistical significance can be found (two-tailed Student’s *t*-test, unpaired).


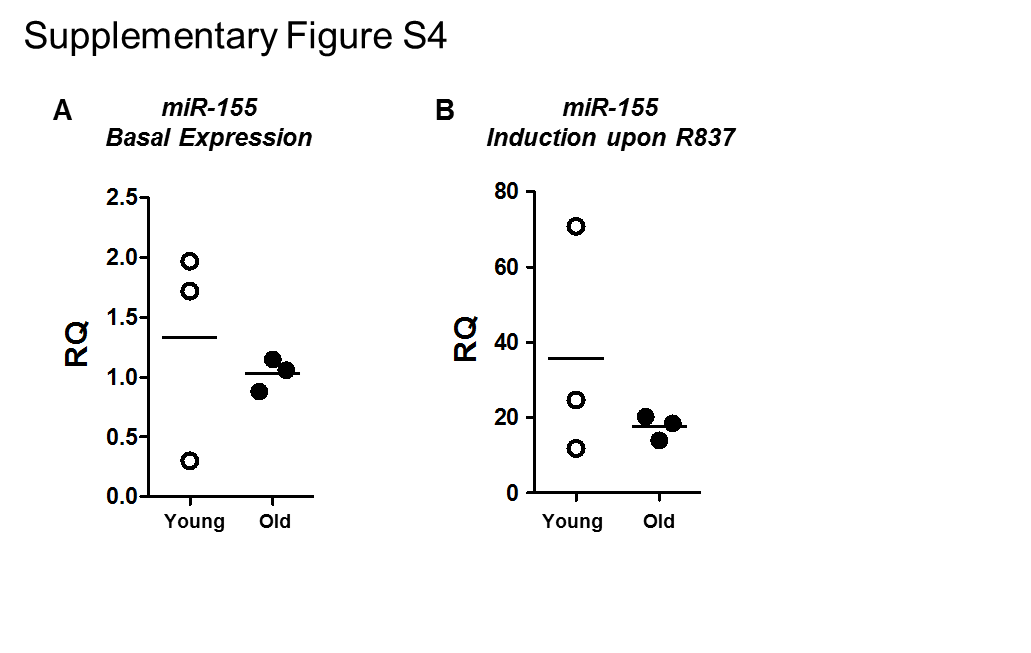


**Figure S4.** Induction of miR-155 upon TLR7 stimulation is comparable in young and old NZW mice. Expression of miR-155in unstimulated pDCs (**A**) and R837-stimulated pDCs (**B**) from young (Young, open circles) and old NZW mice (Old, black circles) were compared. Each symbol represents sample from one experimental mouse (*n* = 3). *Bar:* mean value. N statistical significance can be found (two-tailed Student’s *t-*test, unpaired).

© 2016 by the authors. Submitted for possible open access publication under the
terms and conditions of the Creative Commons Attribution (CC-BY) license (http://creativecommons.org/licenses/by/4.0/).
